# Supplementary material for: Relaxation dynamics of nucleosomal DNA
Source: Royal Society of Chemistry journal article supplement (doi:10.1039/b910937b), 2009-01-01
Supplement: b910937b.pdf [file b910937b.pdf]

# Supplementary Material

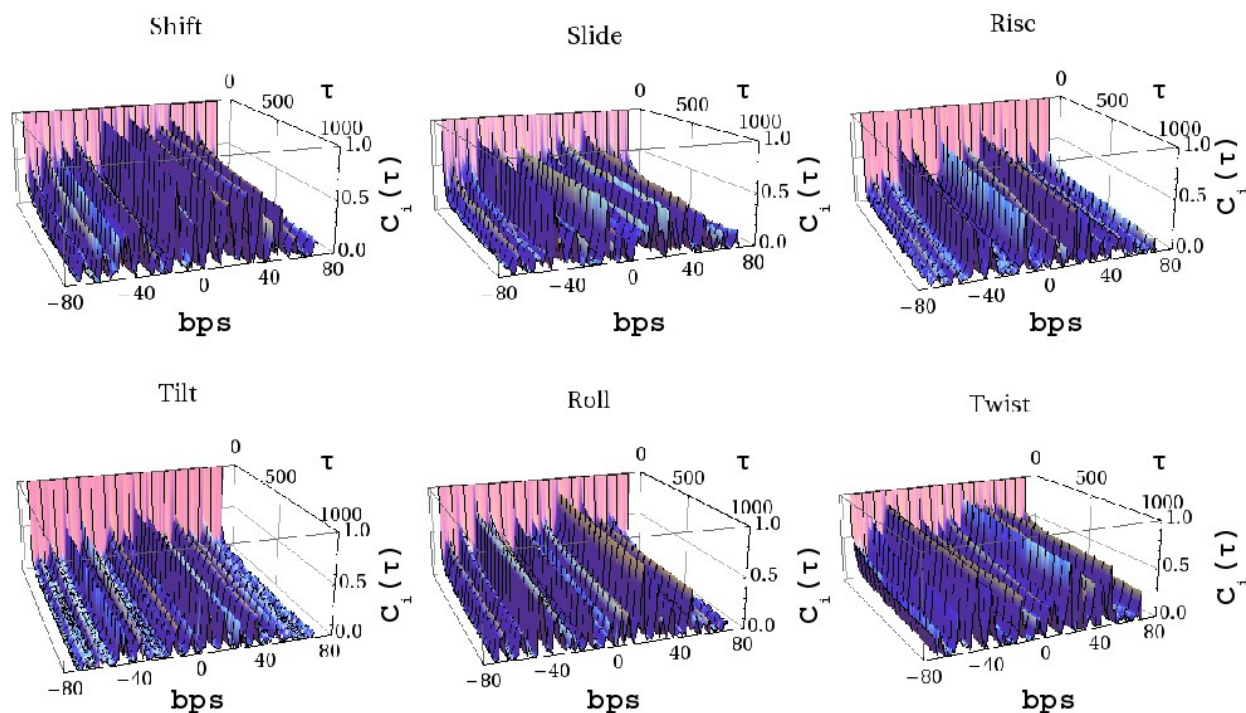

S1. 3D autocorrelation functions  $C(\tau)$  of helix parameters for nuc-lid3, where  $\tau$  is lag time, ps, and bps is DNA base pair number.

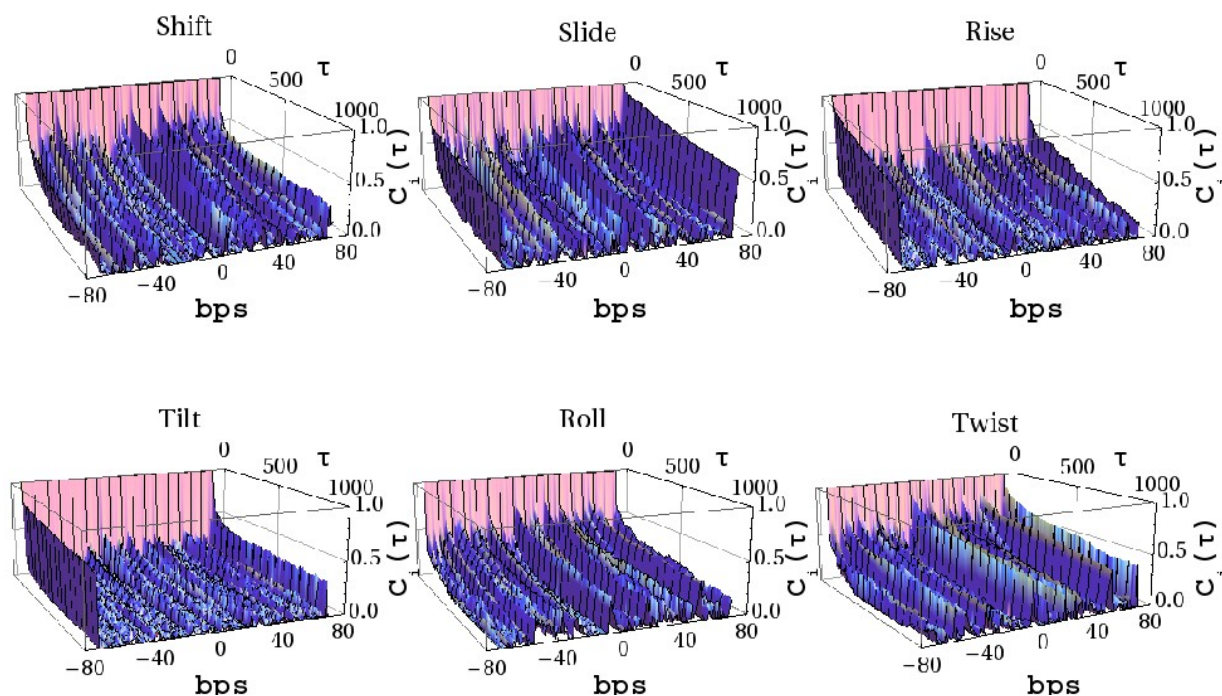

S2. 3D autocorrelation functions  $C(\tau)$  of helix parameters for sc-DNA, where  $\tau$  is lag time, ps, and bps is DNA base pair number.

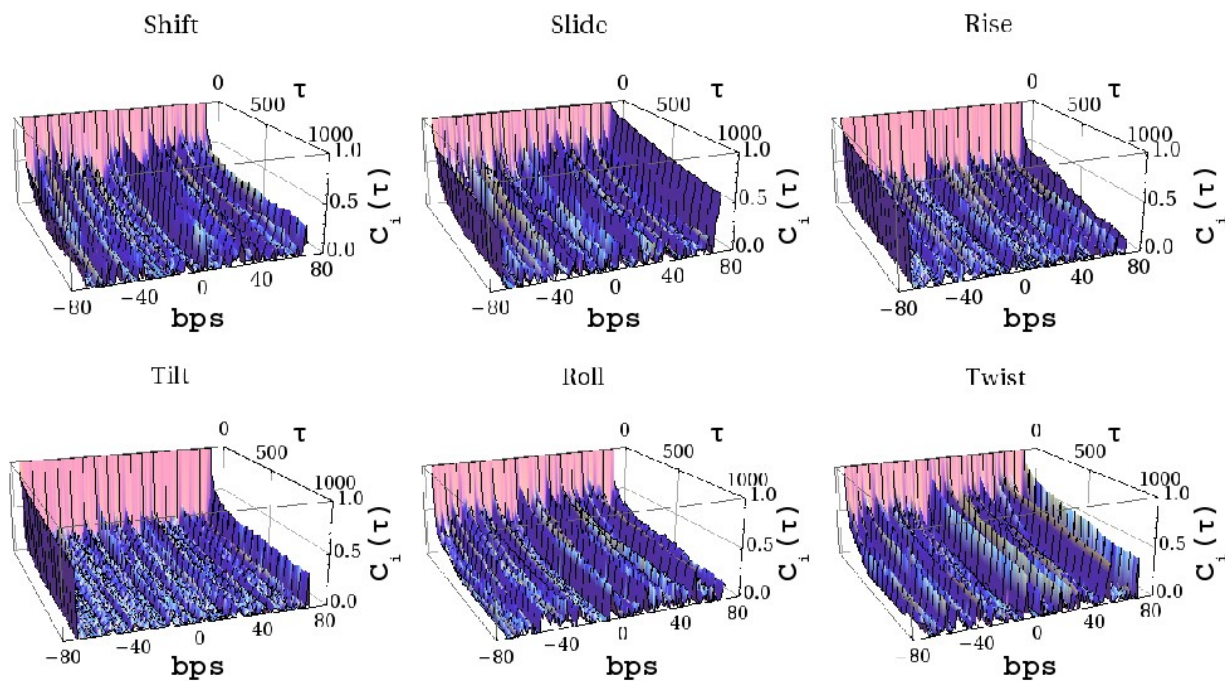

S3. 3D autocorrelation functions  $C(\tau)$  of helix parameters for AB-DNA, where  $\tau$  is lag time, ps, and bps is DNA base pair number.

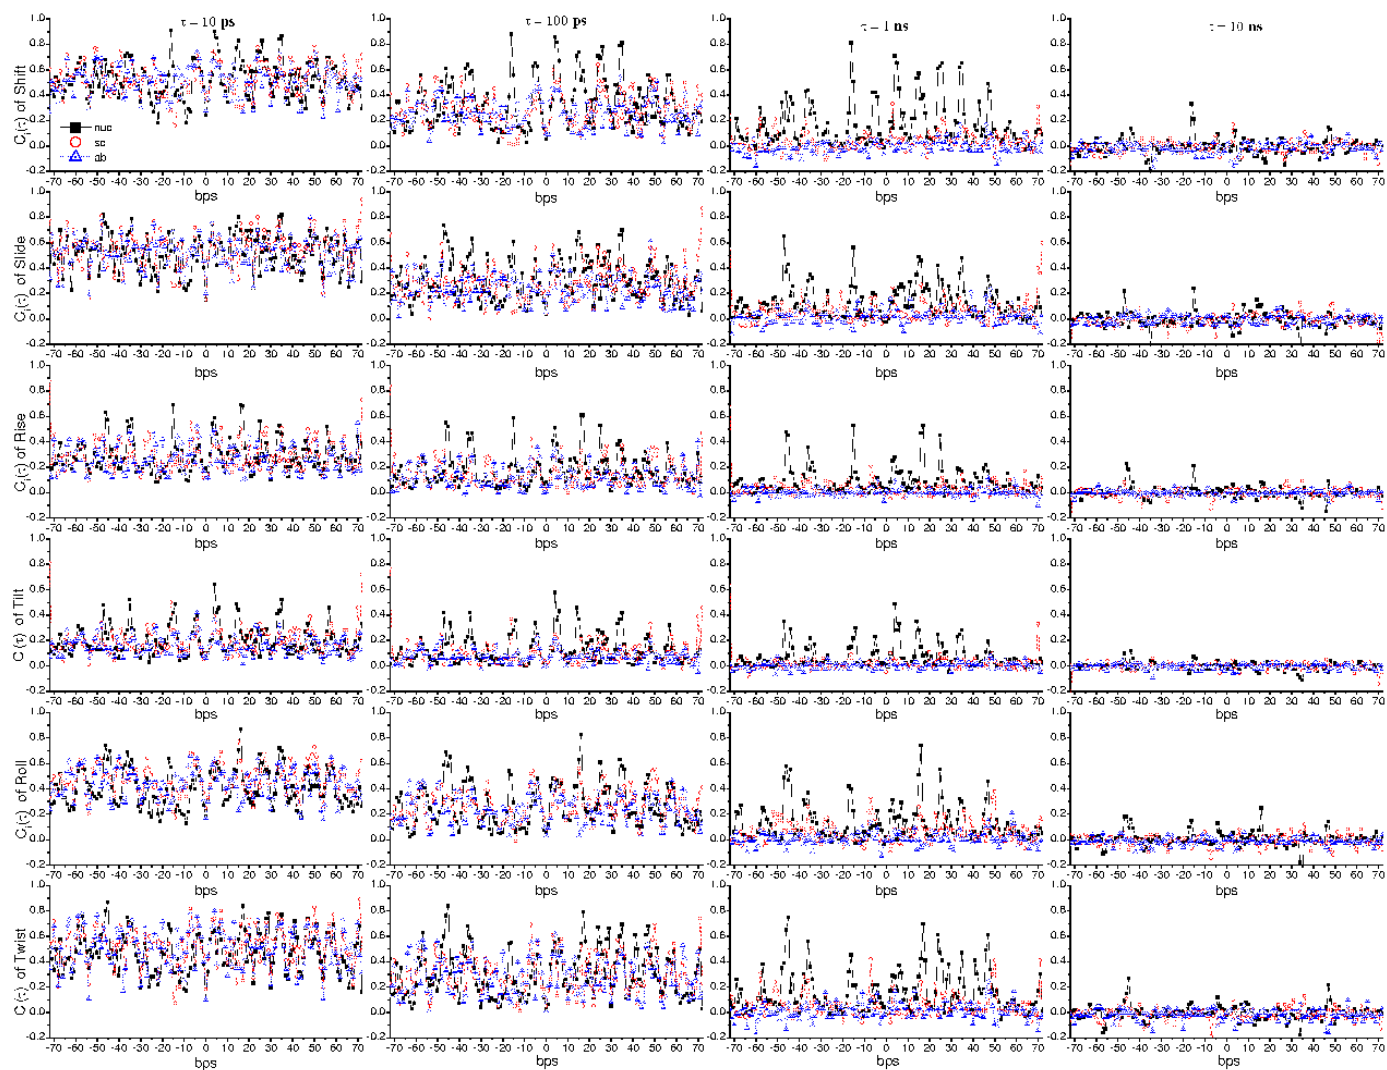

**S4. 2D cross sections of 3D autocorrelation data of shift, slide, rise, tilt, roll and twist for nuc-lid3, sc-DNA and AB-DNA at times  $\tau = 10$  ps, 100 ps, 1 ns, 10 ns.**

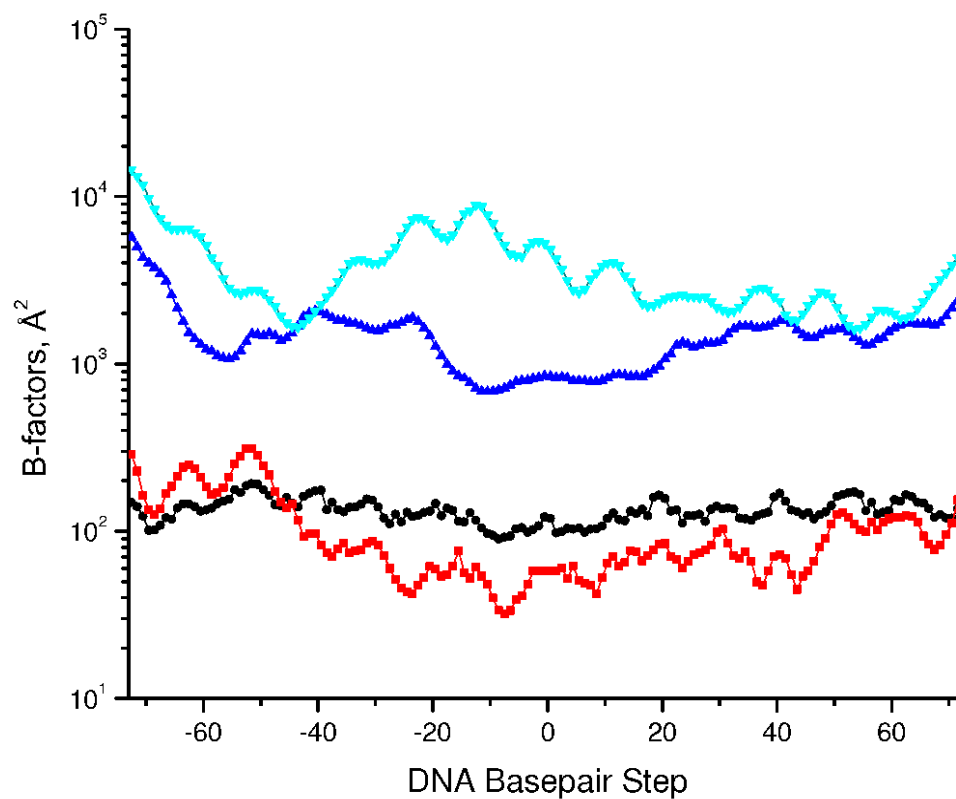

S5. B-factors from lid3 x-ray structure (black circles) and simulations of nuc-lid3 (red squares), sc-DNA (blue triangles) and AB-DNA (cyan down triangles) as a function of DNA basepair.

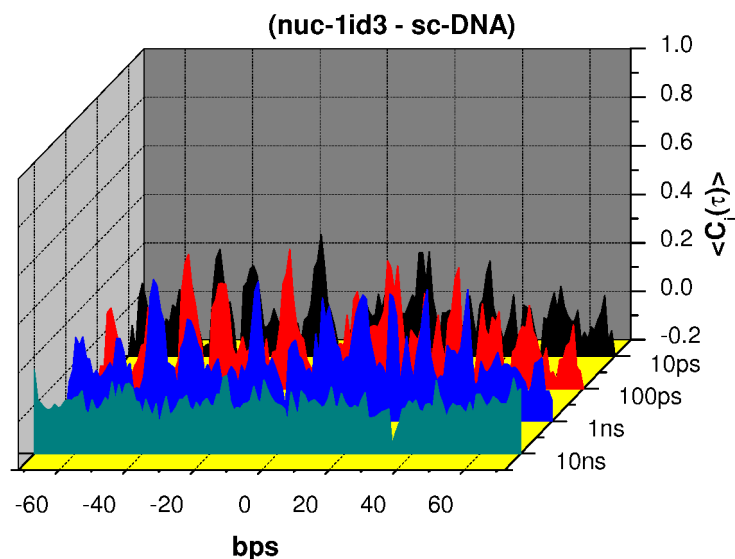

S6. Differential cross sections of 3D autocorrelation functions,  $C_{\text{nuc-1id3}}(\tau) - C_{\text{sc-DNA}}(\tau)$ , of helix parameters along the DNA length for nuc-1id3 at time instances  $\tau = 10\text{ps}, 100\text{ps}, 1\text{ns}, 10\text{ns}$ . Original cross sections are provided in Figure 2.

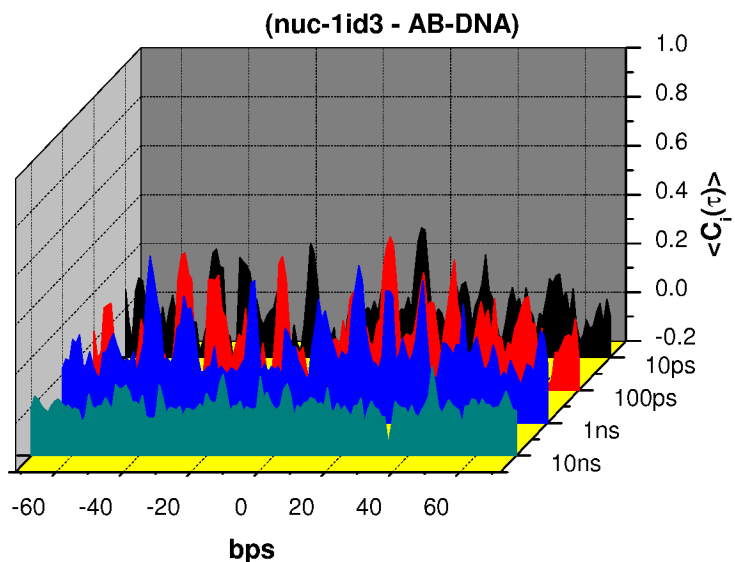

S7. Differential cross sections of 3D autocorrelation functions,  $C_{\text{nuc-1id3}}(\tau) - C_{\text{AB-DNA}}(\tau)$ , of helix parameters along the DNA length for nuc-1id3 at time instances  $\tau = 10\text{ps}, 100\text{ps}, 1\text{ns}, 10\text{ns}$ . Original cross sections are provided in Figure 2.

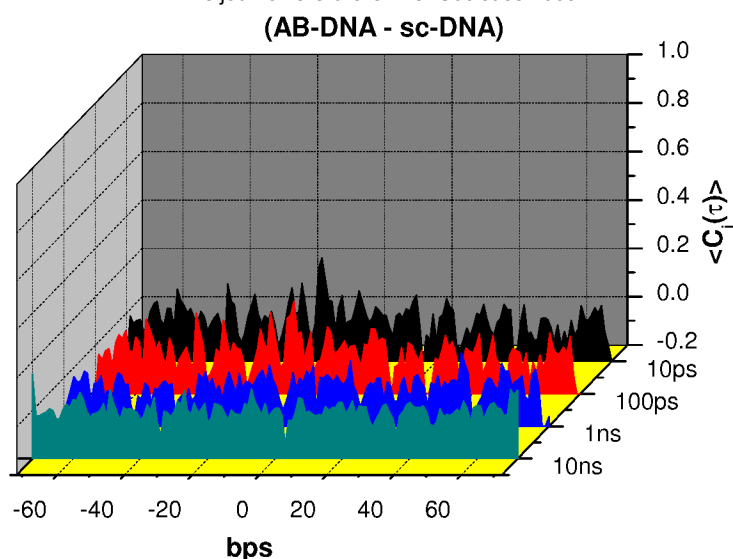

S8. Differential cross sections of 3D autocorrelation functions,  $C_{\text{AB-DNA}}(\tau)$ - $C_{\text{sc-DNA}}(\tau)$ , of helix parameters along the DNA length for AB-DNA at time instances  $\tau = 10\text{ps}, 100\text{ps}, 1\text{ns}, 10\text{ns}$ . Original cross sections are provided in Figure 2.

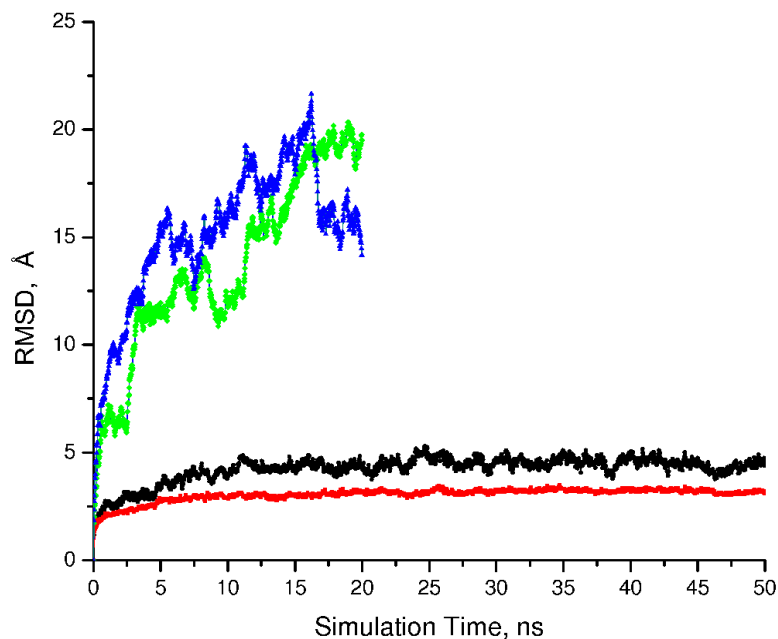

S9. Root mean square deviations of nuc-1ld3 (black circles - dna; red squares - protein), sc-DNA (green diamonds) and AB-DNA (blue triangles) with respect to their starting structures.

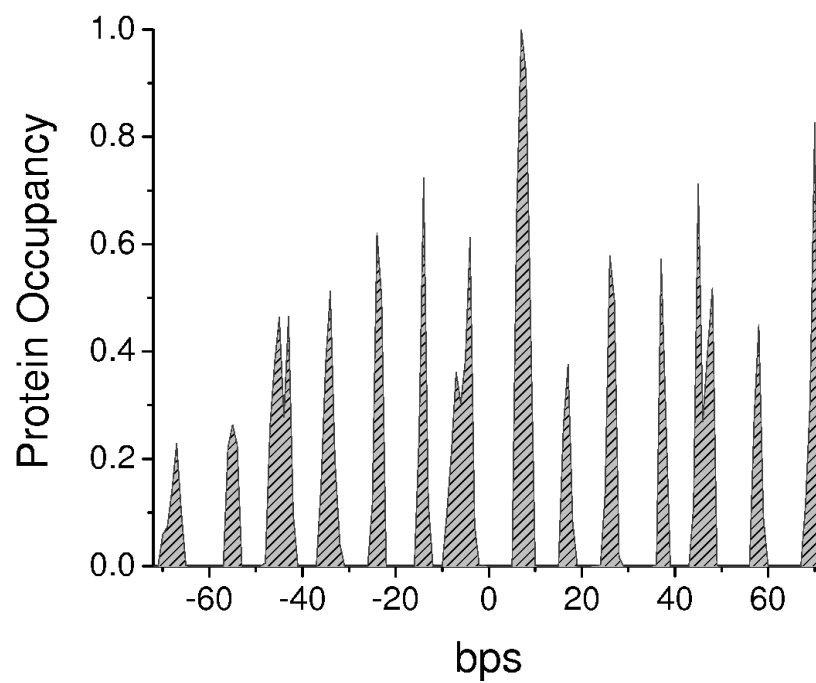

S10. Normalized protein occupancy as a function of DNA base pair step, bps,  
in nuc-1id3.
